# Stomata open at night in pole-sized and mature ponderosa pine: implications for O<sub>3</sub> exposure metrics

N. E. GRULKE,<sup>1,2</sup> R. ALONSO,<sup>1</sup> T. NGUYEN,<sup>1</sup> C. CASCIO<sup>3</sup> and W. DOBROWOLSKI<sup>1</sup>

<sup>1</sup> USDA Forest Service, Pacific Southwest Research Station, 4955 Canyon Crest Drive, Riverside, CA 92507, USA

<sup>2</sup> Corresponding author (ngrulke@fs.fed.us)

<sup>3</sup> University of Florence, Piazzale delle Cascine 28, Firenze, 50144, Italy

Received March 21, 2003; accepted February 8, 2004; published online July 1, 2004

**Summary** Ponderosa pine (*Pinus ponderosa* Dougl. ex Laws.) is widely distributed in the western USA. We report the lack of stomatal closure at night in early summer for ponderosa pine at two of three sites investigated. Trees at a third site with lower nitrogen dioxide and nitric acid exposure, but greater drought stress, had slightly open stomata at night in early summer but closed stomata at night for the rest of the summer. The three sites had similar background ozone exposure during the summer of measurement (2001). Nighttime stomatal conductance ( $g_s$ ) ranged from one tenth to one fifth that of maximum daytime values. In general, pole-sized trees (< 40 years old) had greater nighttime  $g_s$  than mature trees (> 250 years old). In late summer, nighttime  $g_s$  was low (< 3.0 mmol H<sub>2</sub>O m<sup>-2</sup> s<sup>-1</sup>) for both tree size classes at all sites. Measurable nighttime  $g_s$  has also been reported in other conifers, but the values we observed were higher. In June, nighttime ozone (O<sub>3</sub>) uptake accounted for 9, 5 and 3% of the total daily O<sub>3</sub> uptake of pole-sized trees from west to east across the San Bernardino Mountains. In late summer, O<sub>3</sub> uptake at night was < 2% of diel uptake at all sites. Nocturnal O<sub>3</sub> uptake may contribute to greater oxidant injury development, especially in pole-sized trees in early summer.

**Keywords:** ozone exposure, nighttime opening, stomatal conductance.

## Introduction

Stomatal opening is under tight biological control to maximize carbon uptake while minimizing water loss (Cowan 1977). It is influenced by light, substomatal CO<sub>2</sub> concentrations (Aphalo and Jarvis 1993), vapor pressure deficit (Assmann and Gershenson 1991), foliar temperature, the whole-plant response of the soil water-to-air continuum including endogenous limitations (Ryan and Yoder 1997) and hormonal changes in response to drought stress (Christmann et al. 1995). Stomatal function can also be disturbed by oxidant air pollutants (Matyssek et al. 1995, Heath and Taylor 1997, Mansfield 1998, Robinson et al. 1998).

Stomata are not always totally closed during the night in C<sub>3</sub> plants (Musselman and Minnick 2000). Open stomata at night

have been reported in some tree species exposed to moderate and higher oxidant exposure (*Picea abies* (L.), Wieser and Havranek 1993; *Betula pendula* Roth., Matyssek et al. 1995; *Larix decidua* Mill., Wieser and Havranek 1995; *B. pendula*, *Populus euramericana* (Dode) Guinier and *Alnus glutinosa* (L.) Gaertner, Günthardt-Goerg et al. 1997). During the day at elevated oxidant concentrations, sluggish responses of stomata have also been observed in response to changes in light and vapor pressure deficits in coniferous (Tobiessen 1982, Reich and Lassoie 1984, Patterson and Rundel 1989, Grulke 1999) and herbaceous species (Younglove et al. 1988). Significant stomatal conductance ( $g_s$ ) during the night could be related to compromised cuticle or stomatal occlusions that limit stomatal closure. Exposure to high concentrations of both nitrogen oxides and nitric acid vapor are known to alter cuticular and epistomatal wax structures and occlude stomata (Norby et al. 1989, Bytnerowicz et al. 1998, 1999). Ozone exposure can also degrade cuticular waxes (Barnes et al. 1988, Kerstiens and Lenzian 1989, Percy et al. 1992).

Although stomatal uptake of O<sub>3</sub> is the best metric for evaluating plant response to O<sub>3</sub> (Musselman and Minnick 2000, Grulke et al. 2002), both the USA (Stockwell et al. 1997) and the E.U. (Führer et al. 1997) use O<sub>3</sub> exposure, accumulated approximately from dawn to dusk over various thresholds (e.g., 40 ppb, 60 ppb), over the growing season. These metrics assume that stomata are closed and that O<sub>3</sub> concentrations decrease significantly at night. In mountainous terrain, however, O<sub>3</sub> concentrations can remain high during the night (Aneja et al. 1994, Loibl et al. 1994, Van Ooy and Carroll 1995).

In this paper, we describe nighttime stomatal behavior in two tree size classes (40-year-old and 250-year-old) of ponderosa pine (*Pinus ponderosa* Dougl. ex Laws.), one of the most O<sub>3</sub>-sensitive conifers in western North America (Miller et al. 1983). In order to describe sluggish stomatal responses, we measured the time to reach equilibrium in response to small increases in low irradiances at sites differing in environmental stressors (ozone exposure, nitrogenous deposition and drought). We also estimated the contribution of nighttime O<sub>3</sub> uptake to total diel O<sub>3</sub> uptake in early and late summer.

## Materials and methods

### Research sites

Pole-sized (40 years old) and mature (> 250 years old) ponderosa pine were sampled in pine-dominated, mixed conifer forests (Barbour 1988). Three study sites were selected across the San Bernardino Mountains east of Los Angeles, California: two western sites (Crestline (CR): 34°14'05" N, 117°19'12" W; Strawberry Peak (SP): 34°14'00" N, 117° 08'12" W) and an eastern site (Barton Flats (BF): 34°09'42" N, 116°51'00" W) at 1800, 2240 and 1820 m in elevation, respectively. Historically, trees at the study sites were exposed to a gradient of O<sub>3</sub> exposure and nitrogen deposition already well described (Miller et al. 1989, Grulke et al. 1998, Grulke and Balduman 1999). However, pollutant deposition patterns in the San Bernardino Mountains have changed recently (see Table 1, Figure 1).

### Soil water and plant water relations

Both gravimetric soil water content and predawn needle xylem water potentials ( $\Psi_L$ ) were determined monthly during the same week as the intensive gas exchange measurements. Soil samples were collected within 1 m of the bole of the study trees, at a depth of 15 cm in mineral soil for pole-sized trees and at 15 and 50 cm for mature trees. Soil samples were passed through a 2-mm sieve, immediately placed in soil tins, sealed, weighed, oven-dried at 65 °C, and then reweighed. Water content was reported as percent of dry mass. Predawn needle xylem water potentials of previous-year fascicles from lower canopy foliage were determined with a pressure chamber (PMS, Corvallis, OR) for both tree size classes (Pallardy et al. 1991).

### Canopy health assessments

At the end of September, chlorotic mottle of each needle age class and the number of needle age classes retained were assessed following excision of three mid-canopy branches of each study tree with a pole pruner. These attributes were aver-

aged for each tree size class at each site, and were used to calculate a canopy health score according to the Forest Pest Management method (FPM; Pronos et al. 1978). The FPM score is based on the first needle age class with more than 10% chlorotic mottling per needle on more than a third of the needles of that whorl.

### Gas exchange measurements

Gas exchange of six trees per tree size class at each site was measured monthly from June through September 2001 with an open photosynthesis monitoring system (Model LI-6400, Li-Cor, Lincoln, NE). Three previous-year fascicles on primary branches in the lower third of the canopy were measured. Gas exchange measurements were conducted at night between 2300 h and predawn (0500–0600 h, depending on the month), with CO<sub>2</sub> concentration fixed at 385 ppm. Because the instrument was to operate near its detection limits, particular care was taken in the nightly calibration, and the instrument was allowed to reach equilibrium under ambient conditions for 1 h before measurements. The same CO<sub>2</sub> span gas was used throughout the summer, and the H<sub>2</sub>O signal was calibrated with a dewpoint generator (Li-Cor Model 610) at stable temperatures at 1900 m (an elevation intermediate to the range at the sites). Before each light response, the sample and reference infrared gas analyzers were electronically matched. Null cuvette measurements were made before and after each light response curve and at no time exceeded 0.2 mmol H<sub>2</sub>O m<sup>-2</sup> s<sup>-1</sup>. To test for temporal delays in stomatal opening in response to dawn, needles were exposed to successive increases in irradiance (at night) to simulate the *g<sub>s</sub>* response to dawn (blue + red light at 30, 60, 90 and 120 μmol m<sup>-2</sup> s<sup>-1</sup>). At each irradiance, the time required for equilibration and the value of *g<sub>s</sub>* at equilibrium were recorded. The instantaneous graphics program associated with the photosynthesis monitoring system assisted in equilibrium determination. Light response curves for mature trees in June at Barton Flats and for both tree size classes during the summer were not performed because of the excessive time required to open stomata (> 2 h). Stomatal conductance values were reported on a needle surface area basis. The needle surface area was determined from a geometric model and measurements of fascicle diameter and needle length enclosed in the cuvette.

### Needle surface microscopy

The surfaces of needles from each site and tree size class were examined by scanning electron microscopy as described by Bytnerowicz et al. (1999). Without touching the cuticle, six previous-year needles from different primary branches were collected from each tree size class at each site in mid-August, placed in cryovials, and transported to the laboratory.

### Atmospheric chemistry monitoring

Ozone concentrations were measured with an ozone monitor (Model 1003 AH, Dasibi, Glendale, CA) every 5 min and averaged and recorded at 1-h intervals at BF. Hourly ozone concentrations were adjusted based on a daily two-point calibration (O<sub>3</sub>-free air and 100 ppb). The ozone monitor was calibrated against a tertiary transfer standard at the University of Califor-

Table 1. Summary of gaseous pollutant exposure from passive samplers (NO<sub>2</sub>, HNO<sub>3</sub><sup>-</sup>, NH<sub>3</sub>) at three sites over the summer of 2001. Replicate samples of NO<sub>2</sub> had a mean SD of 6%; HNO<sub>3</sub><sup>-</sup> samplers had a mean 9% error; and quadruplicate samples had a mean 3% error (Bytnerowicz et al. 2002).

| Site            | Month  | NO <sub>2</sub><br>(ppb) | HNO <sub>3</sub> <sup>-</sup><br>(μg m <sup>-3</sup> ) | NH <sub>3</sub><br>(μg m <sup>-3</sup> ) |
|-----------------|--------|--------------------------|--------------------------------------------------------|------------------------------------------|
| Crestline       | June   | 6                        | 5                                                      | 4                                        |
|                 | July   | 7                        | 4                                                      | 4                                        |
|                 | August | 7                        | 6                                                      | 4                                        |
| Strawberry Peak | June   | 6                        | 3                                                      | 4                                        |
|                 | July   | 8                        | 3                                                      | 3                                        |
|                 | August | 7                        | 5                                                      | 4                                        |
| Barton Flats    | June   | 2                        | 2                                                      | 2                                        |
|                 | July   | 3                        | 2                                                      | 4                                        |
|                 | August | 3                        | 2                                                      | 3                                        |

nia, Riverside, and passed audit by South Coast Air Quality Air Management District on May 23, 2001. The light source of the O<sub>3</sub> monitor was adjusted on August 14 to bring the sample and control frequencies within the appropriate range. This resulted in a 5 ppb drop in the zero offset and a 6% decrease in the slope of the calibration curve. On September 21, the calibration was changed back to the same range as it had been before August 14. Because the sample and control frequencies were out of range before both adjustments, the calibration and resulting values were retained. Despite these problems, the error in the readings of the O<sub>3</sub> monitor had a mean daily value of only 2% (over the 87 days) and a range from -9 to 8%. The closest active O<sub>3</sub> monitoring station to the SP field site was 2 km east, and 80 m lower in elevation at the Rim Forest High School (maintained by the California Air Resources Board). This station has direct exposure to the pollution plume transported into the mountains. The SP field site was located on the north side of Strawberry Peak, 0.5 km into the forest from the forest–chaparral interface. Ozone concentrations at the field site are likely to be at least 2 ppb lower than those reported by the monitoring station, based on similar site comparisons in the Sierra Nevada (Bytnerowicz et al. 2002). For the Crestline site, O<sub>3</sub> data was obtained from the Lake Gregory station of the South Coast Air Quality Management District, 4 km east of the Crestline site. Their hourly values at 0400, 0500 and 0600 h were increased by 3 ppb based on statistical comparisons between active monitors stationed at Camp Paivika (on site) and Lake Gregory during 1993 and 1994 (Grulke 1999).

Atmospheric concentrations of nitrogen dioxide (NO<sub>2</sub>), nitric acid vapor (HNO<sub>3</sub>), and ammonia (NH<sub>3</sub>) were measured from deposition on passive surfaces that were collected and analyzed every 2 weeks. Values given in Table 1 are thus the mean of the first and second 2-week exposure periods each month. Nitrogen dioxide was collected on Ogawa passive samplers in triplicate (Koutrakis et al. 1993) using triethanolamine (TEA) as an absorbent and determined colorimetrically with a Beckman DU-65 spectrophotometer (Ogawa 1998). Nitric acid vapor was collected in triplicate on Nylasorb nylon filters (Nylasorb, Pall Corporation) hung under polyethylene caps protecting the filters from wind and rain. Ammonia was determined with diffusion tubes (Gradko International, Winchester, U.K.) in quadruplicate, with 1% (w/v) sulfuric acid as a collection reagent. Air-borne NH<sub>3</sub> was converted to ammonium on collecting pads of the sampler. Ammonium was extracted with nanopure water and analyzed by colorimetry (Technicon TRAACS Autoanalyzer). Cumulative NH<sub>3</sub> exposure was calculated based on results of a calibration curve made against a honeycomb denuder system (Alonso et al. 2002).

#### Nighttime versus daytime O<sub>3</sub> uptake calculations

Daily O<sub>3</sub> uptake was calculated from diurnal measurements of *g<sub>s</sub>* of six pole-sized trees at each site in each month (Grulke et al. 2002) during a year of average precipitation, and hourly O<sub>3</sub> concentrations measured in 2001 at each site, averaged for each hour over the month to match the conductance data. To calculate O<sub>3</sub> uptake, *g<sub>s</sub>* was multiplied by a constant (0.612,

Laisk 1989) to adjust for the difference in diffusivity between water vapor and O<sub>3</sub>. Nighttime *g<sub>s</sub>* was assumed to be constant over the whole night at the values measured. Daytime hours for each month varied (June, 0500–2000 h; July and August, 0500–1900 h; September, 0600–1800 h) based on photosynthetic photon flux (PPF) measurements made on site in 1993 and 1994 (Grulke et al. 2002). Stomatal conductance values < 2.0 mmol H<sub>2</sub>O m<sup>-2</sup> s<sup>-1</sup> were considered within the measurement error of the gas exchange system and uptake was calculated, but not considered significant at this value.

## Results

### Environmental stressors

During the summer of 2001, all three sites had similar daytime O<sub>3</sub> concentrations (Figure 1). Ozone concentrations in July were depressed because of frequent morning fogs. Nighttime O<sub>3</sub> concentrations were similar at CR and BF, but were higher at Rim Forest (the closest O<sub>3</sub> monitoring station to SP) by 4 ppb (both sites) in June, by 14 and 12 ppb (CR and BF, respectively) in July, by 7 and 9 ppb in August, and by 5 and 16 ppb in September. The potential differences (2 ppb) in O<sub>3</sub> concentrations between the monitoring station and the field station were small relative to site-to-site differences. Nitrogen dioxide was twice as high (6–8 ppb) at the two western sites (CR, SP) as at the eastern site (BF) (Table 1). Nitric acid deposition averaged 40% higher (4–6 µg m<sup>-3</sup>) at the westernmost site (CR) relative to SP; HNO<sub>3</sub> deposition was 80% higher at SP than at the eastern site (BF). Ammonia deposition was similar across all three sites (3–4 µg m<sup>-3</sup>) and slightly less at the eastern site (2 µg m<sup>-3</sup>) in early summer.

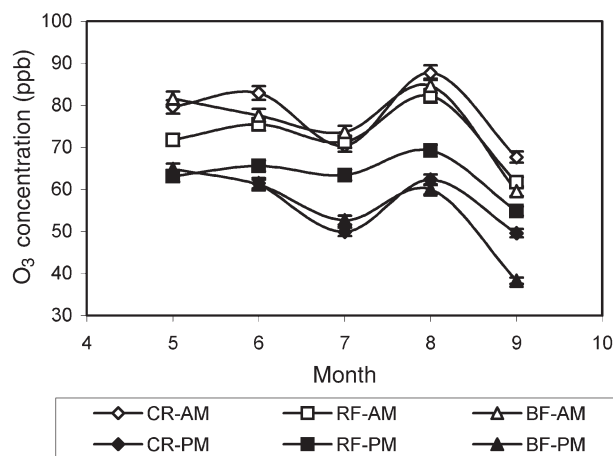

Figure 1. Mean monthly daytime (AM) and nighttime (PM) ozone concentrations for the three sites. The Barton Flats (BF) O<sub>3</sub> monitor had an error with a mean daily value of 2% and a range from -9% to 8% from June through September. Rim Forest High School monitoring station (RF) was the closest site to Strawberry Peak for measurements on an active monitor (data for this site courtesy of California Air Resources Board). Data for Crestline (CR) were from Lake Gregory, courtesy of South Coast Air Quality Resource Division. Error bars indicate  $\pm 1$  SE.

There were significant differences in soil water availability at the three sites (data not presented). Soil water content over the summer (June 22 through September 27) was low (2–5%) at both soil depths (15 and 50 cm) near trees at the eastern site, whereas soil water content ranged from 12% in June to 7% in September at the westernmost site (CR). The SP site had intermediate soil water content values, ranging from 8% in June to 7% in September. Within a site, the two tree size classes had similar predawn needle xylem potentials (Figure 2). Trees at the eastern site had lower predawn needle xylem potentials (–1.3 MPa) than at the other sites in June, and values declined to –1.9 MPa by September. At the western sites (CR, SP), predawn needle xylem potentials were relatively high (–1.0 MPa) in June, July and August. In September, predawn needle xylem potentials ranged between –1.3 and –1.7 MPa, but differed significantly between sites only for pole-sized trees.

Foliar injury and needle retention are visible symptoms of oxidant injury (Miller et al. 1996) and, to some extent, drought stress (Grulke 2003, Grulke et al. 2003). Among sites, SP had lower canopy health as reflected in the FPM score, especially for the pole-sized trees (Table 2). High background nitrogen deposition at CR may have mitigated chlorotic mottle symptoms, but would have also reduced foliar retention. The lower chlorotic mottle of foliage and the higher needle retention at BF indicates lower exposure to atmospheric pollution at this site, despite greater drought stress. Lower canopy health at SP supports greater total oxidant exposures, and could reflect

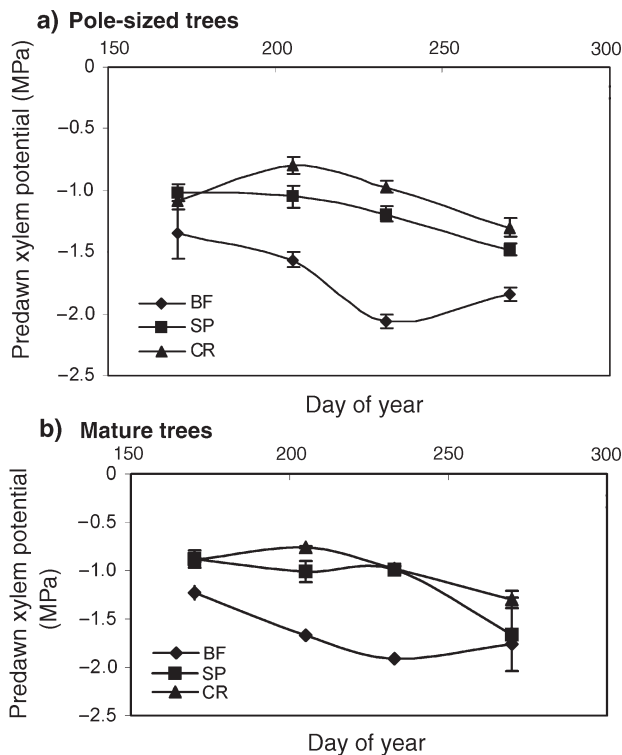

Figure 2. Seasonal course of predawn needle xylem potentials at the three sites. Symbols represent the mean  $\pm$  1 SE of six trees of each tree size class at the three sites monitored. Abbreviations: BF = Barton Flats; SP = Strawberry Peak; and CR = Crestline.

Table 2. Comparison of the Forest Pest Management (FPM) scores for historic versus current canopy health. Data are means with 1 SD. The FPM score is the whorl number of the youngest needle size class with 10% chlorotic mottle per needle on more than a third of the needles in that whorl.

| Site            | Tree size | 1988 <sup>1</sup> | 1994 <sup>2</sup> | 2001 <sup>3</sup> |
|-----------------|-----------|-------------------|-------------------|-------------------|
| Barton Flats    | Pole      |                   |                   | 2.5 (0.2)         |
|                 | Mature    | 2.4               | 1.4               | 3.0 (0.3)         |
| Strawberry Peak | Pole      |                   |                   | 1.3 (0.2)         |
|                 | Mature    | 1.1               | n.d.              | 1.6 (0.3)         |
| Crestline       | Pole      |                   |                   | 2.3 (0.4)         |
|                 | Mature    | 0.3               | 0.4               | 2.6 (0.3)         |

<sup>1</sup> Miller et al. (1989); data taken 3 km east of Strawberry Peak.

<sup>2</sup> Miller and Rechel (1998); no data for mature trees.

<sup>3</sup> This study.

greater late-summer drought stress.

#### Nighttime stomatal conductance

In June, nighttime  $g_s$  ranged from 8 to 19  $\text{mmol H}_2\text{O m}^{-2} \text{s}^{-1}$  at the two western sites (CR, SP; Figure 3). At the eastern site (BF) in June,  $g_s$  was low (3 to 5  $\text{mmol H}_2\text{O m}^{-2} \text{s}^{-1}$ ). Nighttime  $g_s$  decreased from early to late summer at all sites, from 19 to  $< 2 \text{ mmol H}_2\text{O m}^{-2} \text{s}^{-1}$ . Nighttime  $g_s$  of both tree size classes at CR was relatively high in June and was similar to that of mature trees at SP. The pole-sized trees at SP had lower nighttime  $g_s$  than mature trees in June. In July, nighttime  $g_s$  of the mature trees at the two western sites was lower than that of pole-sized trees. In late summer, nighttime  $g_s$  was  $< 2 \text{ mmol H}_2\text{O m}^{-2} \text{s}^{-1}$  for both tree size classes at all sites.

No apparent cuticular lesions were detected on the needle surfaces of foliage of either tree size class that would have contributed significantly to needle conductance earlier in the summer (shown here only for mature foliage in August, Figure 4).

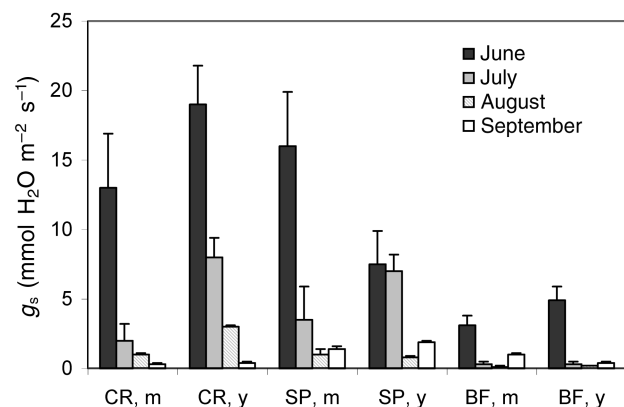

Figure 3. Nighttime stomatal conductance ( $g_s$ ) at three sites over the growing season. Abbreviations: CR = Crestline with high pollution; SP = Strawberry Peak with moderately high pollution; BF = Barton Flats with moderate pollution; m = mature trees; and y = pole-sized trees.

There was also no evidence of stomatal occlusions that might have physically limited stomatal closure.

#### Stomatal conductance response to simulated dawn

The slope of the response curve of  $g_s$  to PPF for pole-sized trees did not differ significantly at the three sites in June ( $P = 0.155$ ; Figure 5). The largest difference between the responses was the increasing y-intercept from BF ( $2 \pm 0 \mu\text{mol m}^{-2} \text{s}^{-1}$ ) to SP ( $6 \pm 2 \mu\text{mol m}^{-2} \text{s}^{-1}$ ) to CR ( $19 \pm 3 \mu\text{mol m}^{-2} \text{s}^{-1}$ ) (CR statis-

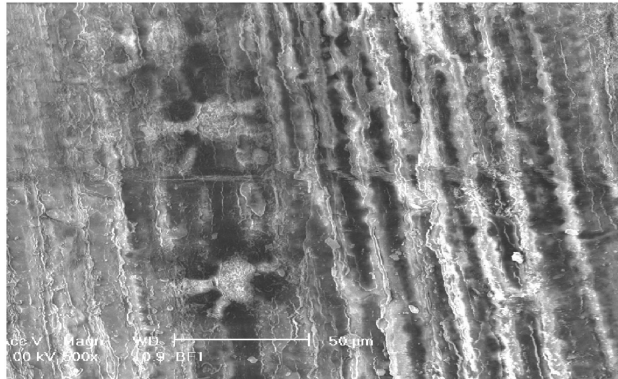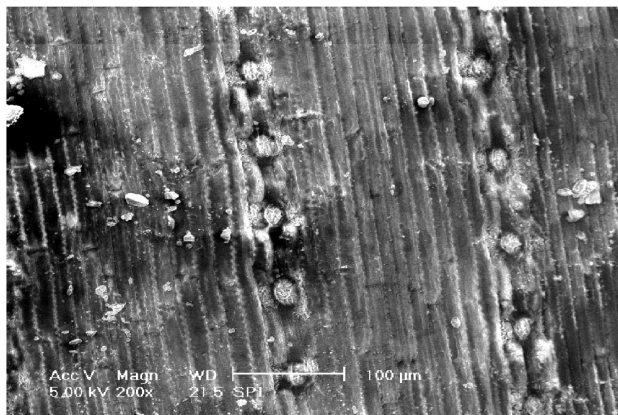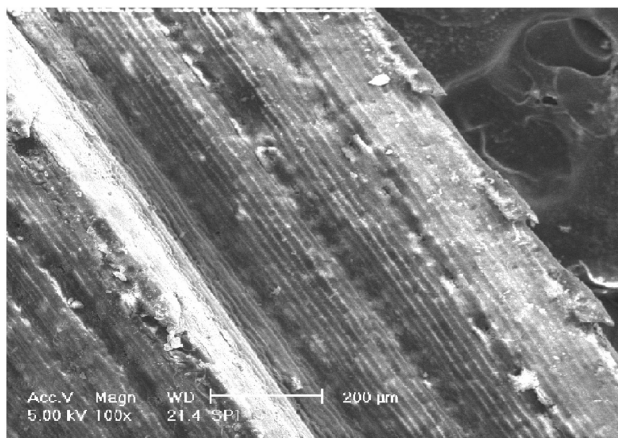

Figure 4. Micrographs of needle surfaces from pole-sized trees at three sites in August (from top to bottom): Barton Flats, Strawberry Peak and Crestline. Micrographs courtesy of P. Padgett (USDA Forest Service, Pacific Southwest Research Station, USA).

tically significant based on a one-way ANOVA at  $P = 0.05$ ). The maximum stomatal opening obtained at night at  $120 \mu\text{mol quanta m}^{-2} \text{s}^{-1}$  declined from June to August at the two western sites (CR, SP) for both tree size classes (Figure 6). Mature trees had lower  $g_s$  at all irradiances than pole-sized trees at both CR and SP in July and August.

#### Seasonal increase in stomatal response to low light

The time required for stomata to open fully at  $120 \mu\text{mol quanta m}^{-2} \text{s}^{-1}$  was similar between the two tree age classes at SP, and it took successively longer to reach equilibrium through the growing season (Figure 7). At CR, the time required to open stomata fully increased from June to July, but decreased from July to August for both tree age classes. In June, about the same time (10–15 min) was required to open the stomata from dark to  $30 \mu\text{mol m}^{-2} \text{s}^{-1}$  as was required to reach equilibrium at each higher irradiance. In July, 25–30 min was required to open stomata fully at  $30 \mu\text{mol m}^{-2} \text{s}^{-1}$  for both tree size classes at both sites. Stomata of pole-sized trees at Crestline were fully induced at  $90 \mu\text{mol m}^{-2} \text{s}^{-1}$  and did not open further with additional light in July. In August, slightly more time (30–35 min) was required to open stomata fully at  $30 \mu\text{mol m}^{-2} \text{s}^{-1}$  at SP for both tree size classes, but less time (15–20 min) was required at CR for both tree size classes. Few differences were found between the two tree size classes in the speed of stomatal opening, but when there were differences, mature trees generally took less time to equilibrate than pole-sized trees.

#### Seasonal changes in daytime and nighttime $\text{O}_3$ uptake

Estimates of nighttime foliar  $\text{O}_3$  uptake ranged from 11 to <1% of total daily uptake (Figure 8). In June, nighttime  $\text{O}_3$  uptake was 3% of estimated 24-h uptake at BF, 5% at SP and 9% at CR. For the rest of the growing season at BF, nighttime  $g_s$  was low, and foliar  $\text{O}_3$  uptake was negligible. In July, nighttime  $\text{O}_3$  uptake accounted for 5% of diel uptake at both western sites. In August, nighttime  $\text{O}_3$  uptake accounted for 4% of diel

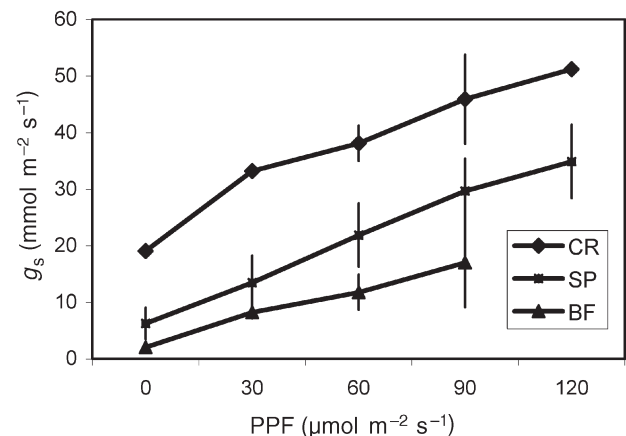

Figure 5. Stomatal response of pole-sized trees to simulated dawn (blue + red) at night at all sites in June. Abbreviations:  $g_s$  = stomatal conductance; PPF = photosynthetic photon flux; BF = Barton Flats; SP = Strawberry Peak; and CR = Crestline. Error bars indicate  $\pm 1$  SE about the mean.

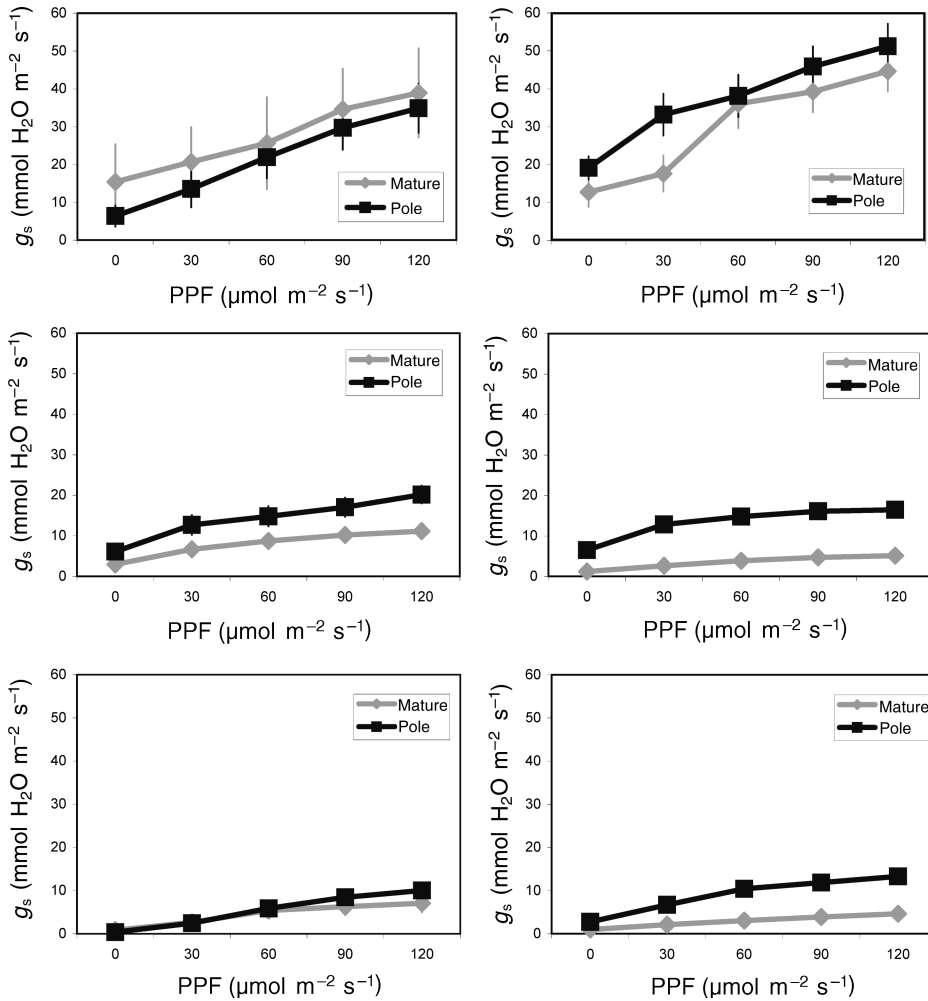

Figure 6. Seasonal course of stomatal response to simulated dawn (blue + red) at night at Strawberry Peak (left column) and Crestline (right column) in June (top), July (middle) and August (bottom). Abbreviations:  $g_s$  = stomatal conductance; and PPF = photosynthetic photon flux. Error bars indicate  $\pm 1$  SE about the mean.

uptake at CR, but was negligible at SP. Nighttime  $\text{O}_3$  uptake was negligible at all sites in September. Despite higher nighttime  $\text{O}_3$  concentrations at SP, the proportion of nighttime  $\text{O}_3$  uptake was lower than that at CR. The proportion of  $\text{O}_3$  uptake attributable to nighttime uptake was significantly affected by time of dawn and dusk, sluggishness of stomata to close at dusk, and the resolution of  $g_s$  measurements near the detection limit of the instrument.

**Discussion**

In early summer, both pole-sized and mature trees had open stomata at night. Values of nighttime  $g_s$  for ponderosa pine ranged from 3 to 19  $\text{mmol H}_2\text{O m}^{-2} \text{s}^{-1}$  in June, two to three times higher than nighttime values previously reported for other conifers (Keller and Häslér 1984, Skärby et al. 1987, Wieser and Havranek 1993). Typical values for daytime maximum  $g_s$  ranged from 60 to 90  $\text{mmol H}_2\text{O m}^{-2} \text{s}^{-1}$  in early sum-

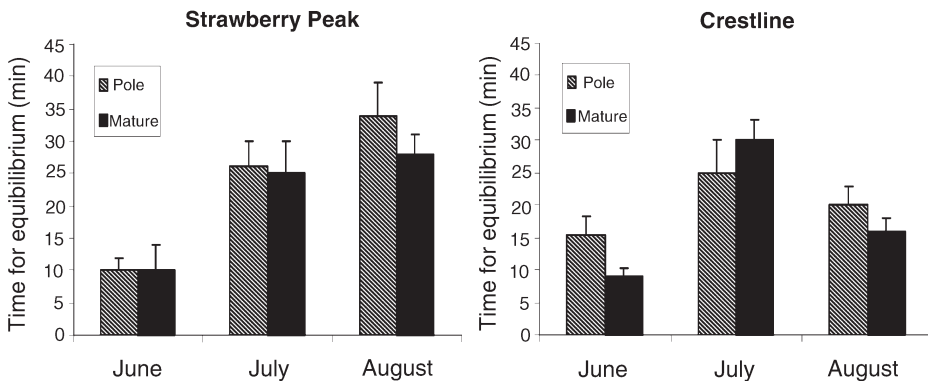

Figure 7. Time required to achieve a stable response to low irradiance ( $30 \mu\text{mol m}^{-2} \text{s}^{-1}$ ) following darkness over the course of the growing season at Strawberry Peak and Crestline. Error bars indicate  $\pm 1$  SE about the mean.

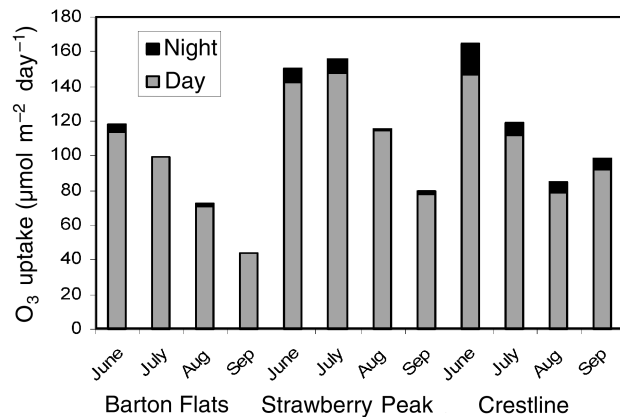

Figure 8. Estimated nighttime versus total daily O<sub>3</sub> uptake for ponderosa pine at monthly time steps at three sites in southern California.

mer and 35 to 70 mmol H<sub>2</sub>O m<sup>-2</sup> s<sup>-1</sup> in late summer for pole-sized trees at the same sites (Grulke et al. 2002). No damage to needle cuticles were found that could explain the values of nighttime foliar transpiration observed, nor were stomatal occlusions apparent. Nighttime  $g_s$  decreased with accumulating pollutant exposure.

Pollutant exposure was higher at the western sites (CR: NO<sub>2</sub>, HNO<sub>3</sub>; SP: NO<sub>2</sub>, nighttime O<sub>3</sub>) relative to the eastern site (BF). Canopy health at SP was poor, especially for pole-sized trees. Canopy health at CR was slightly better than at SP, and high nitrogen deposition at CR may have helped mitigate foliar injury due to oxidant exposure (Grulke 2003). Although drought stress probably reduced pollutant uptake at the eastern site (BF), better canopy health supported overall lower pollutant exposure (Table 2). It is unknown how higher historical pollutant exposures affected our results. As late as 1994, O<sub>3</sub> concentrations were significantly greater at CR (80 ppb, 24-h mean over 6 months) than at SP (69 ppb) and BF (64 ppb) (Grulke 1999). Comparable values in 2001 were significantly lower at CR (62 ppb, 24 h average over 5 months), but similar at SP (65 ppb) and BF (62 ppb). Mature tree canopy health has improved at all sites since 1988 and at BF and CR since 1994.

Super-elevated CO<sub>2</sub> concentrations (e.g., > 5000 ppm) can open stomata at night (Wheeler et al. 1999), but in this study, background concentrations were not high (< 450 ppm at night) and were constantly monitored. Other air pollutants can disturb stomatal control mechanisms (Matyssek et al. 1995, Heath and Taylor 1997, Mansfield 1998, Robinson et al. 1998), but the responses to these pollutants have been studied mainly during the daytime. Under controlled experimental exposures, O<sub>3</sub> increases cell membrane permeability to K<sup>+</sup>, resulting in stomatal closure (Heath and Taylor 1997). Ponderosa pine seedlings exposed to elevated O<sub>3</sub> concentration have shown both decreased (Weber et al. 1993) and increased  $g_s$  (Beyers et al. 1992) relative to seedlings grown in charcoal-filtered air. However, both responses can be explained by the effect of substomatal CO<sub>2</sub> concentration ( $C_i$ ) on stomatal aperture (Cowan 1977). In the first study, exposure to elevated O<sub>3</sub> concentration reduced photosynthetic rate, increasing  $C_i$ , and resulting in a proportional closure of stomatal aper-

ture. In the second study (Beyers et al. 1992), exposure to both elevated O<sub>3</sub> concentration and drought stress reduced the leaf area of seedlings, and translocated N elevated both foliar N and photosynthetic rate of the remaining foliage with a proportional increase in stomatal aperture. However, exposure to elevated O<sub>3</sub> concentration may also decouple the relationship between assimilation and  $g_s$  (Matyssek et al. 1995, Tjoelker et al. 1995, Grulke 1999), lowering water-use efficiency.

Ozone exposure alone has been shown to increase nighttime  $g_s$  in other conifer species (Keller and Häslar 1984, Skärby et al. 1987, Wieser and Havranek 1993). Physical damage of epidermal cells and abnormal maintenance of open stomata in birch resulted from the combined effects of sulfur oxides and nitrogen oxides (*Betula* spp., Neighbour et al. 1988). The combined effects of SO<sub>2</sub> and O<sub>3</sub> compromised cell wall integrity of guard cells and reduced stomatal control in Norway spruce (Maier-Maercker and Koch 1995). The concentrations of NO<sub>2</sub> and HNO<sub>3</sub> alone at the western sites were not expected to elicit aberrations in stomatal behavior directly (Wellburn 1990, Bytnerowicz et al. 1998). However, the background O<sub>3</sub> exposure combined with NO<sub>2</sub> and HNO<sub>3</sub> may have contributed to the responses observed.

Drought stress throughout the summer at the eastern site, and drought stress in late summer at the western sites appeared to promote nighttime stomatal closure. Higher drought stress at SP relative to CR could explain the increasingly sluggish stomatal response in late summer (Figure 7): more light would be required to overcome higher concentrations of foliar abscisic acid (ABA) (Christmann et al. 1995). During the day, drought stress in combination with elevated O<sub>3</sub> concentration had the opposite effect on beech (*Fagus sylvatica* L.; Davidson et al. 1992, Pearson and Mansfield 1993) and Norway spruce (Wallin and Skärby 1992, Karlsson et al. 1997).

Calculated O<sub>3</sub> uptake at night accounted for 9% (CR), 5% (SP) and 3% (BF) of the 24-h total O<sub>3</sub> uptake in early summer, but was negligible in late summer at all sites. Calculations of O<sub>3</sub> uptake were more sensitive to day length and daytime  $g_s$  than to a 10 ppb difference in O<sub>3</sub> concentration. Although it represents only a small portion of the total daily O<sub>3</sub> uptake at these sites, nighttime O<sub>3</sub> uptake could still be physiologically stressful. Concentrations of foliar antioxidants, and their regeneration capacity are lower at night (Schupp and Rennenberg 1988, Faria et al. 1996, Tausz et al. 2001). Both ascorbate and glutathione require NADPH regenerated by photosynthetic electron transport to stay reduced and scavenge oxidants (Foyer et al. 1994). Other species exposed to O<sub>3</sub> during the night have shown similar or higher O<sub>3</sub>-induced injury than plants growing in elevated O<sub>3</sub> concentrations during the daytime, despite lower nighttime  $g_s$  (Matyssek et al. 1995, Günthardt-Georg et al. 1997). In this study, mature trees had lower nighttime  $g_s$  than pole-sized trees, and foliage from mature trees is known to have greater antioxidant protection on a leaf surface area basis (Tegischer et al. 2002, Wieser et al. 2002). Daytime  $g_s$  was similar between pole-sized and mature ponderosa pine (Grulke and Retzlaff 2001). Pollutant uptake combined with the absence of light-derived energy to scavenge oxidants might have contributed to the poor canopy health of pole-sized trees at SP.

Stomata of ponderosa pine were partially open at night, at 5 to 20% of daytime values. Stomata of both pole-sized and mature trees were open, but pole-sized trees generally had higher nighttime conductance. Nighttime conductance declined through the growing season at all sites despite accumulating exposure to O<sub>3</sub>, nitrous oxides and nitric acid exposure. The decline in *g<sub>s</sub>* and the increase in sluggish response to low irradiances through the growing season were most likely related to an increase in drought stress and accompanying hormonal increase in foliar ABA concentration (Christmann et al. 1995). There was no evidence for cuticular degradation or stomatal occlusions that would result in the observed pattern of responses. Early summer nighttime uptake of O<sub>3</sub> was low (3 to 9%), and probably should not be accumulated for the purposes of determining tree response to cumulative O<sub>3</sub> exposure in natural stands. However, nighttime uptake of oxidants may have deleterious physiological effects because oxidants absorbed by foliage at night are not detoxified as well as during the day. Coupled with relatively high daytime uptake, high physiological activity required for growth, nighttime uptake of oxidants in early summer could contribute to the overall declining health of forest trees, especially of pole-sized trees.

#### Acknowledgments

We gratefully acknowledge a Fulbright Scholarship that provided support for Rocio Alonso, and the University of Florence for support of Chiara Cascio to complete this research. We thank Max Marrett, Jenny Rechel, Marcia Narog and Chaos Narog for help with the nighttime stomatal conductance measurements.

#### References

- Alonso, R., A. Bytnerowicz and M.J. Arbaugh. 2002. Vertical distribution of ozone and nitrogenous pollutants in an air quality Class I area, the San Geronio Wilderness, southern California. *TheScientificWorldJOURNAL* 2:10–26. <http://www.thescientificworld.com/TSWPubs/Journal/Detail.asp?ArtID=37762239>.
- Aneja, V.P., C.S. Claiborn, Z. Li and A. Murthy. 1994. Trends, seasonal variations, and analysis of high elevation surface nitric acid, ozone and hydrogen peroxide. *Atmos. Environ.* 28:1781–1790.
- Aphalo, P.J. and P.G. Jarvis. 1993. Separation of direct and indirect responses of stomata to light: results from a leaf inversion experiment at constant intercellular CO<sub>2</sub> molar fraction. *J. Exp. Bot.* 44:791–800.
- Assmann, S.M. and A. Gershenson. 1991. The kinetics of stomatal responses to VPD in *Vicia faba*: electrophysiological and water relations models. *Plant Cell Environ.* 14:455–465.
- Barbour, M.G. 1988. Californian upland forests and woodlands. *In* North American Terrestrial Vegetation. Eds. M.G. Barbour and W.D. Billings. Cambridge University Press, New York, pp 131–164.
- Barnes, J.D., A.W. Davison and T.A. Booth. 1988. Ozone accelerates structural degradation of epicuticular wax on Norway spruce needles. *New Phytol.* 110:309–318.
- Beyers, J.L., G.H. Riechers and P.J. Temple. 1992. Effects of long-term ozone exposure and drought on the photosynthetic capacity of ponderosa pine (*Pinus ponderosa* Laws.). *New Phytol.* 122:81–90.
- Bytnerowicz, A., T. Dueck and S. Godzik. 1998. Nitric oxide, nitrogen dioxide, nitric acid vapor and ammonia. *In* Recognition of Air Pollution Injury to Vegetation: a Pictorial Atlas. Ed. R. Flagler. Air Waste Manage. Assoc., Pittsburg, PA, pp 5.1–5.17.
- Bytnerowicz, A., P. Padgett, K. Percy, M. Krywult, G. Riechers and J. Hom. 1999. Direct effects of nitric acid on forest trees. *In* Oxidant Air Pollution Impacts in the Montane Forests of Southern California: the San Bernardino Mountains Case Study. Eds. P.R. Miller and J. McBride. *Ecol. Stud.* 134:270–287.
- Bytnerowicz, A., P.E. Padgett, M.J. Arbaugh, D.R. Parker and D.P. Jones. 2001. Passive sampler for measurements of atmospheric nitric acid vapor (HNO<sub>3</sub>) concentrations. *TheScientificWorldJOURNAL* 1:815–822. <http://www.thescientificworld.com/TSWPubs/Journal/Detail.asp?ArtID=37753081>.
- Bytnerowicz, A., M. Tausz, R. Alonso, D. Jones, R. Johnson and N. Grulke. 2002. Summer-time distribution of air pollutants in Sequoia National Park, California. *Environ. Pollut.* 18:187–203.
- Christmann, A., B. Frenzel, and P. Schiller. 1995. Phytohormones in needles of healthy and declining silver fir (*Abies alba* Mill.): II. Abscisic acid. *J. Plant Physiol.* 147:419–425.
- Cowan, I.R. 1977. Stomatal behavior and environment. *In* Advances in Botanical Research. Vol. 4. Eds. R.D. Preston and H.W. Woodhouse. Academic Press, San Francisco, pp 117–228.
- Davidson, S.R., M.R. Ashmore and C. Garretty. 1992. Effects of ozone and water deficit on the growth and physiology of *Fagus sylvatica*. *For. Ecol. Manage.* 51:187–193.
- Faria, T., J.I. García-Plazaola, A. Abadía, S. Cerasoli, J.S. Pereira and M.M. Chaves. 1996. Diurnal changes in photoprotective mechanisms in leaves of cork oak (*Quercus suber*) during summer. *Tree Physiol.* 16:115–123.
- Foyer, C.H., M. Lelandais and K.J. Kunert. 1994. Photooxidative stress in plants. *Physiol. Plant.* 92:696–717.
- Führer, J., L. Skärby and M.R. Ashmore. 1997. Critical levels for ozone effects on vegetation in Europa. *Environ. Pollut.* 97:97–106.
- Grulke, N.E. 1999. Physiological responses of ponderosa pine to gradients of environmental stressors. *In* Oxidant Air Pollution Impacts in the Montane Forests of Southern California: the San Bernardino Mountain Case Study. Eds. P.R. Miller and J. McBride. *Ecol. Stud.* 134:126–163.
- Grulke, N.E. 2003. Physiological basis of ozone injury assessment in Sierra Nevada conifers. *In* Assessment of Ozone Distribution and its Effects on Sierra Nevada Ecosystems. Developments in Environ. Sci. Vol. 2. Eds. A. Bytnerowicz, M. Arbaugh and R. Alonso. Elsevier, Amsterdam, pp 55–81.
- Grulke, N.E. and L. Balduman. 1999. Deciduous conifers: high nitrogen deposition and ozone exposure effects on ponderosa pine. *Water Soil Air Pollut.* 116:235–248.
- Grulke, N.E. and W.A. Retzlaff. 2001. Changes in physiological attributes from seedlings to mature ponderosa pine. *Tree Physiol.* 21:275–286.
- Grulke, N.E., C.P. Andersen, M.F. Fenn and P.R. Miller. 1998. Ozone exposure and nitrogen deposition lowers root biomass of ponderosa pine in the San Bernardino Mountains. *Environ. Pollut.* 103:63–73.
- Grulke, N.E., H.K. Preisler, C.C. Fan and W.A. Retzlaff. 2002. A statistical approach to estimate O<sub>3</sub> uptake of ponderosa pine in a Mediterranean climate. *Environ. Pollut.* 119:163–175.
- Grulke, N.E., R. Johnson, A. Esperanza, D. Jones, T. Nguyen, S. Posch and M. Tausz. 2003. Canopy transpiration of Jeffrey pine in mesic and xeric microsites: O<sub>3</sub> uptake and injury response. *Trees* 17:292–298.
- Günthardt-Goerg, M.S., C.J. McQuattie, C. Scheidegger, C. Rhiner and R. Matyssek. 1997. Ozone-induced cytochemical and ultrastructural changes in leaf mesophyll cell walls. *Can. J. For. Res.* 27:453–463.



- Heath, R.L. and G.E. Taylor, Jr. 1997. Physiological processes and plant responses to ozone exposure. *In* Forest Decline and Ozone. Eds. H. Sanderman, A.R. Wellburn and R.L. Heath. *Ecol. Stud.* 127:317–368.
- Karlsson, P.E., E.-L. Medin, G. Wallin, G. Selldén and L. Skärby. 1997. Effects of ozone and drought stress on the physiology and growth of two clones of Norway spruce (*Picea abies*). *New Phytol.* 136:265–275.
- Keller, T. and R. Häslér. 1984. The influence of fall fumigation with ozone on the stomatal behavior of spruce and fir. *Oecologia* 64: 284–286.
- Kerstiens, G. and K.J. Lenzian. 1989. Interactions between ozone and plant cuticles. I. Ozone deposition and permeability. *New Phytol.* 112:13–19.
- Koutrakis, P., C. Sioutas, S.T. Ferguson, J.M. Wolfson, J.D. Mulik and R.M. Burton. 1993. Development and evaluation of a glass honeycomb denuder/filter pack system to collect atmospheric gases and particles. *Environ. Sci. Technol.* 27:2497–2501.
- Laisk, A., O. Kull and H. Moldau. 1989. Ozone concentration in leaf intercellular air spaces is close to zero. *Plant Physiol.* 90: 1163–1167.
- Loibl, W., W. Winiwarter, A. Kopsca, J. Zueger and R. Baumann. 1994. Estimating the spatial distribution of ozone concentrations in complex terrain. *Atmos. Environ.* 28:2557–2566.
- Maier-Maercker, U. and W. Koch. 1995. Poor stomatal control of water balance and the abscission of green needles from a declining stand of spruce trees (*Picea abies* (L.) Karst.) from the northern Alps. *Trees* 10:63–73.
- Mansfield, T.A. 1998. Stomata and plant water relations: does air pollution create problems? *Environ. Pollut.* 101:1–11.
- Matyssek, R., M. Günthardt-Goerg, S. Maurer and T. Keller. 1995. Nighttime exposure to ozone reduces whole-plant production in *Betula pendula*. *Tree Physiol.* 15:159–165.
- Miller, P.R., and J. Rechel. 1998. Long-term crown changes, collateral damage, and litter dynamics of pines in the San Bernardino Mountains. *In* Atmospheric Deposition on Southern Californian Forests: A Case Study in the San Bernardino Mountains. Eds. P.R. Miller and J.R. McBride. Springer-Verlag, New York, pp 164–178.
- Miller, P.R., G.J. Longbotham and C.R. Longbotham. 1983. Sensitivity of selected western conifers to ozone. *Plant Dis.* 67:1113–1115.
- Miller, P.R., J.R. McBride, S.L. Schilling and A.P. Gomez. 1989. Trend of ozone damage to conifer forests between 1974 and 1988 in the San Bernardino Mountains of Southern California. *In* Effects of Air Pollution on Western Forests. Eds. R.K. Olson and A.S. Lefohn, Air Waste Manage. Assoc., Pittsburgh, PA, pp 309–324.
- Miller, P.R., K.W. Stolte, D.M. Duriscoe and J. Pronos. 1996. Evaluating ozone air pollution effects on pines in the western United States. Gen. Tech. Rep. PSW-GTR-155, Pacific Southwest Research Station, Forest Service, U.S. Dept. Agric., Albany, CA, 79 p.
- Musselman, R.C. and T.J. Minnick. 2000. Nocturnal stomatal conductance and ambient air quality standards for ozone. *Atmos. Environ.* 34:719–733.
- Neighbour, E.A., D.A. Cottam and T.A. Mansfield. 1988. Effects of sulphur dioxide and nitrogen dioxide on the control of water loss by birch (*Betula* spp.). *New Phytol.* 108:149–157.
- Norby, R.J., Y. Weerasuriya and P.J. Hanson. 1989. Induction of nitrate reductase activity in red spruce needles by NO<sub>2</sub> and HNO<sub>3</sub> vapor. *Can. J. For. Res.* 19:889–896.
- Ogawa & Company, USA. 1998. NO–NO<sub>2</sub> simultaneous sampling protocol using Ogawa sampler. Pompano Beach, FL, 29 p.
- Pallardy, S.G., J.S. Pereira and W.C. Parker. 1991. Measuring the state of water in tree systems. *In* Techniques and Approaches in Forest Tree Ecophysiology. Eds. J.P. Lassoie and T.M. Hinckley. CRC Press, Boca Raton, pp 27–76.
- Patterson, M. and P. Rundel. 1989. Seasonal physiological responses of ozone-stressed Jeffrey pine in Sequoia National Park, California. *In* Effects of Air Pollution on Western Forests. Eds. R.K. Olson and A.S. Lefohn. Trans. Ser., No. 16, Air Waste Manage. Assoc., Pittsburgh, PA, pp 419–428.
- Pearson, M. and T.A. Mansfield. 1993. Interacting effects of ozone and water stress on the stomatal resistance of beech (*Fagus sylvatica* L.). *New Phytol.* 123:351–358.
- Percy, K.E., K.F. Jensen and C.J. McQuattie. 1992. Effects of ozone and acidic fog on red spruce needle epicuticular wax production, chemical composition, cuticular membrane ultrastructure and needle wettability. *New Phytol.* 122:71–80.
- Pronos, J., D.R. Vogler and R.S. Smith. 1978. An evaluation of ozone injury to pines in the southern Sierra Nevada. Report 78-1. Pacific Southwest Region, USDA Forest Service, Forest Pest Management, Albany, CA, 17 p.
- Reich, P.B. and J.P. Lassoie. 1984. Effects of low level ozone exposure on leaf diffusive conductance and water-use efficiency in hybrid poplar. *Plant Cell Environ.* 7:661–668.
- Robinson, M.F., J. Heath and T.A. Mansfield. 1998. Disturbances in stomatal behaviour caused by air pollutants. *J. Exp. Bot.* 49: 461–469.
- Ryan, M.G. and B.J. Yoder. 1997. Hydraulic limits of tree height and growth. *BioScience* 47:235–242.
- Schupp, R. and H. Rennenberg. 1988. Diurnal changes in the glutathione content in spruce needles (*Picea abies* L.). *Plant Sci.* 57: 113–117.
- Skärby, L., E. Troeng and C.-A. Boström. 1987. Ozone uptake and effects on transpiration, net photosynthesis, and dark respiration in Scots pine. *For. Sci.* 33:801–808.
- Stockwell, W.R., G. Kramm, H.-E. Scheel, V.A. Mohnen and W. Seiler. 1997. Ozone formation, destruction, and exposure in Europe and the United States. *In* Forest Decline and Ozone: A Comparison of Controlled Chamber and Field Experiments. Eds. H. Sanderman, A.R. Wellburn and R.L. Heath. *Ecol. Stud.* 127:1–38.
- Tausz, M., A. Bytnerowicz, M. Arbaugh, A. Wonisch and D. Grill. 2001. Multivariate patterns of biochemical response of *Pinus ponderosa* trees at field plots in the San Bernardino Mountains, Southern California. *Tree Physiol.* 21:329–336.
- Tegischer, K., M. Tausz, G. Wieser and D. Grill. 2002. Tree- and needle-age-dependent variations in antioxidants and photoprotective pigments in Norway spruce needles at the alpine timberline. *Tree Physiol.* 22:591–596.
- Tjoelker, M.G., J.C. Volin, J. Oleksyn and P.B. Reich. 1995. Interaction of ozone pollution and light effects on photosynthesis in a forest canopy experiment. *Plant Cell Environ.* 18:895–905.
- Tobiessen, P. 1982. Dark opening of stomata in successional trees. *Oecologia* 52:356–359.
- Van Ooy, D.J. and J.J. Carroll. 1995. The spatial variation of ozone climatology on the western slope of the Sierra Nevada. *Atmos. Environ.* 29:1319–1330.
- Wallin, G. and L. Skärby. 1992. The influence of ozone on the stomatal and non-stomatal limitation of photosynthesis in Norway spruce, *Picea abies* (L.) Karst., exposed to soil moisture deficit. *Trees* 6:128–136.
- Weber, J.A., C.S. Clark and W.E. Hogsett. 1993. Analysis of the relationships among O<sub>3</sub> uptake, conductance, and photosynthesis in needles of *Pinus ponderosa*. *Tree Physiol.* 13:157–172.

- Wellburn, A.R. 1990. Why are atmospheric oxides of nitrogen usually phytotoxic and not alternative fertilizers? *New Phytol.* 115: 395–429.
- Wheeler, R.M., C.L. MacKowiak, N.C. Yorio and J.C. Sager. 1999. Effects of CO<sub>2</sub> on stomatal conductance: do stomata open at very high CO<sub>2</sub> concentrations? *Ann. Bot.* 83:243–251.
- Wieser, G. and W.M. Havranek. 1993. Ozone uptake in the sun and shade crown of spruce: quantifying the physiological effects of ozone exposure. *Trees* 7:227–232.
- Wieser, G. and W.M. Havranek. 1995. Environmental control of ozone uptake in *Larix decidua* Mill.: a comparison between different altitudes. *Tree Physiol.* 15:253–258.
- Wieser, G., K. Tegischer, M. Tausz, K.-H. Haberle, T.E.E. Grams and R. Matussek. 2002. Age effects on Norway spruce (*Picea abies*) susceptibility to ozone uptake: a novel approach relating stress avoidance to defense. *Tree Physiol.* 22:583–590.
- Younglove, T., P.M. McCool, R.C. Musselman and E. Smith. 1988. The use of transfer models to describe the relationship between pollutant exposure and leaf stomatal opening. *Environ. Exp. Bot.* 28:239–248.
